# Supplementary material for: Common Variants in Left/Right Asymmetry Genes and Pathways Are Associated with Relative Hand Skill
Source: PLoS Genet. 2013 Sep 12;9(9):e1003751. doi: 10.1371/journal.pgen.1003751 (PMC3772043; doi:10.1371/journal.pgen.1003751)
Supplement: Table S6 — In the relative hand skill GWAS meta-analysis of individuals with reading disability, there is an over-representation of highly associated SNPs within human orthologs of genes involved in causing an absent corpus callosum when knocked out in mice. We tested two cerebral phenotypes that are often observed in individuals with ciliopathies for an enrichment of SNPs with low P values. We used an enrichment cut-off that equals the 75th percentile of all gene P values. P values were then adjusted for multiple testing using an FDR correction. (XLSX) [file pgen.1003751.s010.xlsx]

## Sheet: MAGENTA_pval_GeneSetEnrichAnaly
Mouse Phenotype ID	Phenotype	Genes	Median Gene Size / KB	Mean Gene Size / KB	Expected	Observed	Adjusted P
MP:0002196	absent corpus callosum	37	102	162	9	16	0.0163
MP:0001891	hydroencephaly	100	56	92	25	21	0.85175
